# Supplementary material
Source: PubMed Central journal article supplement (PMC3260449)

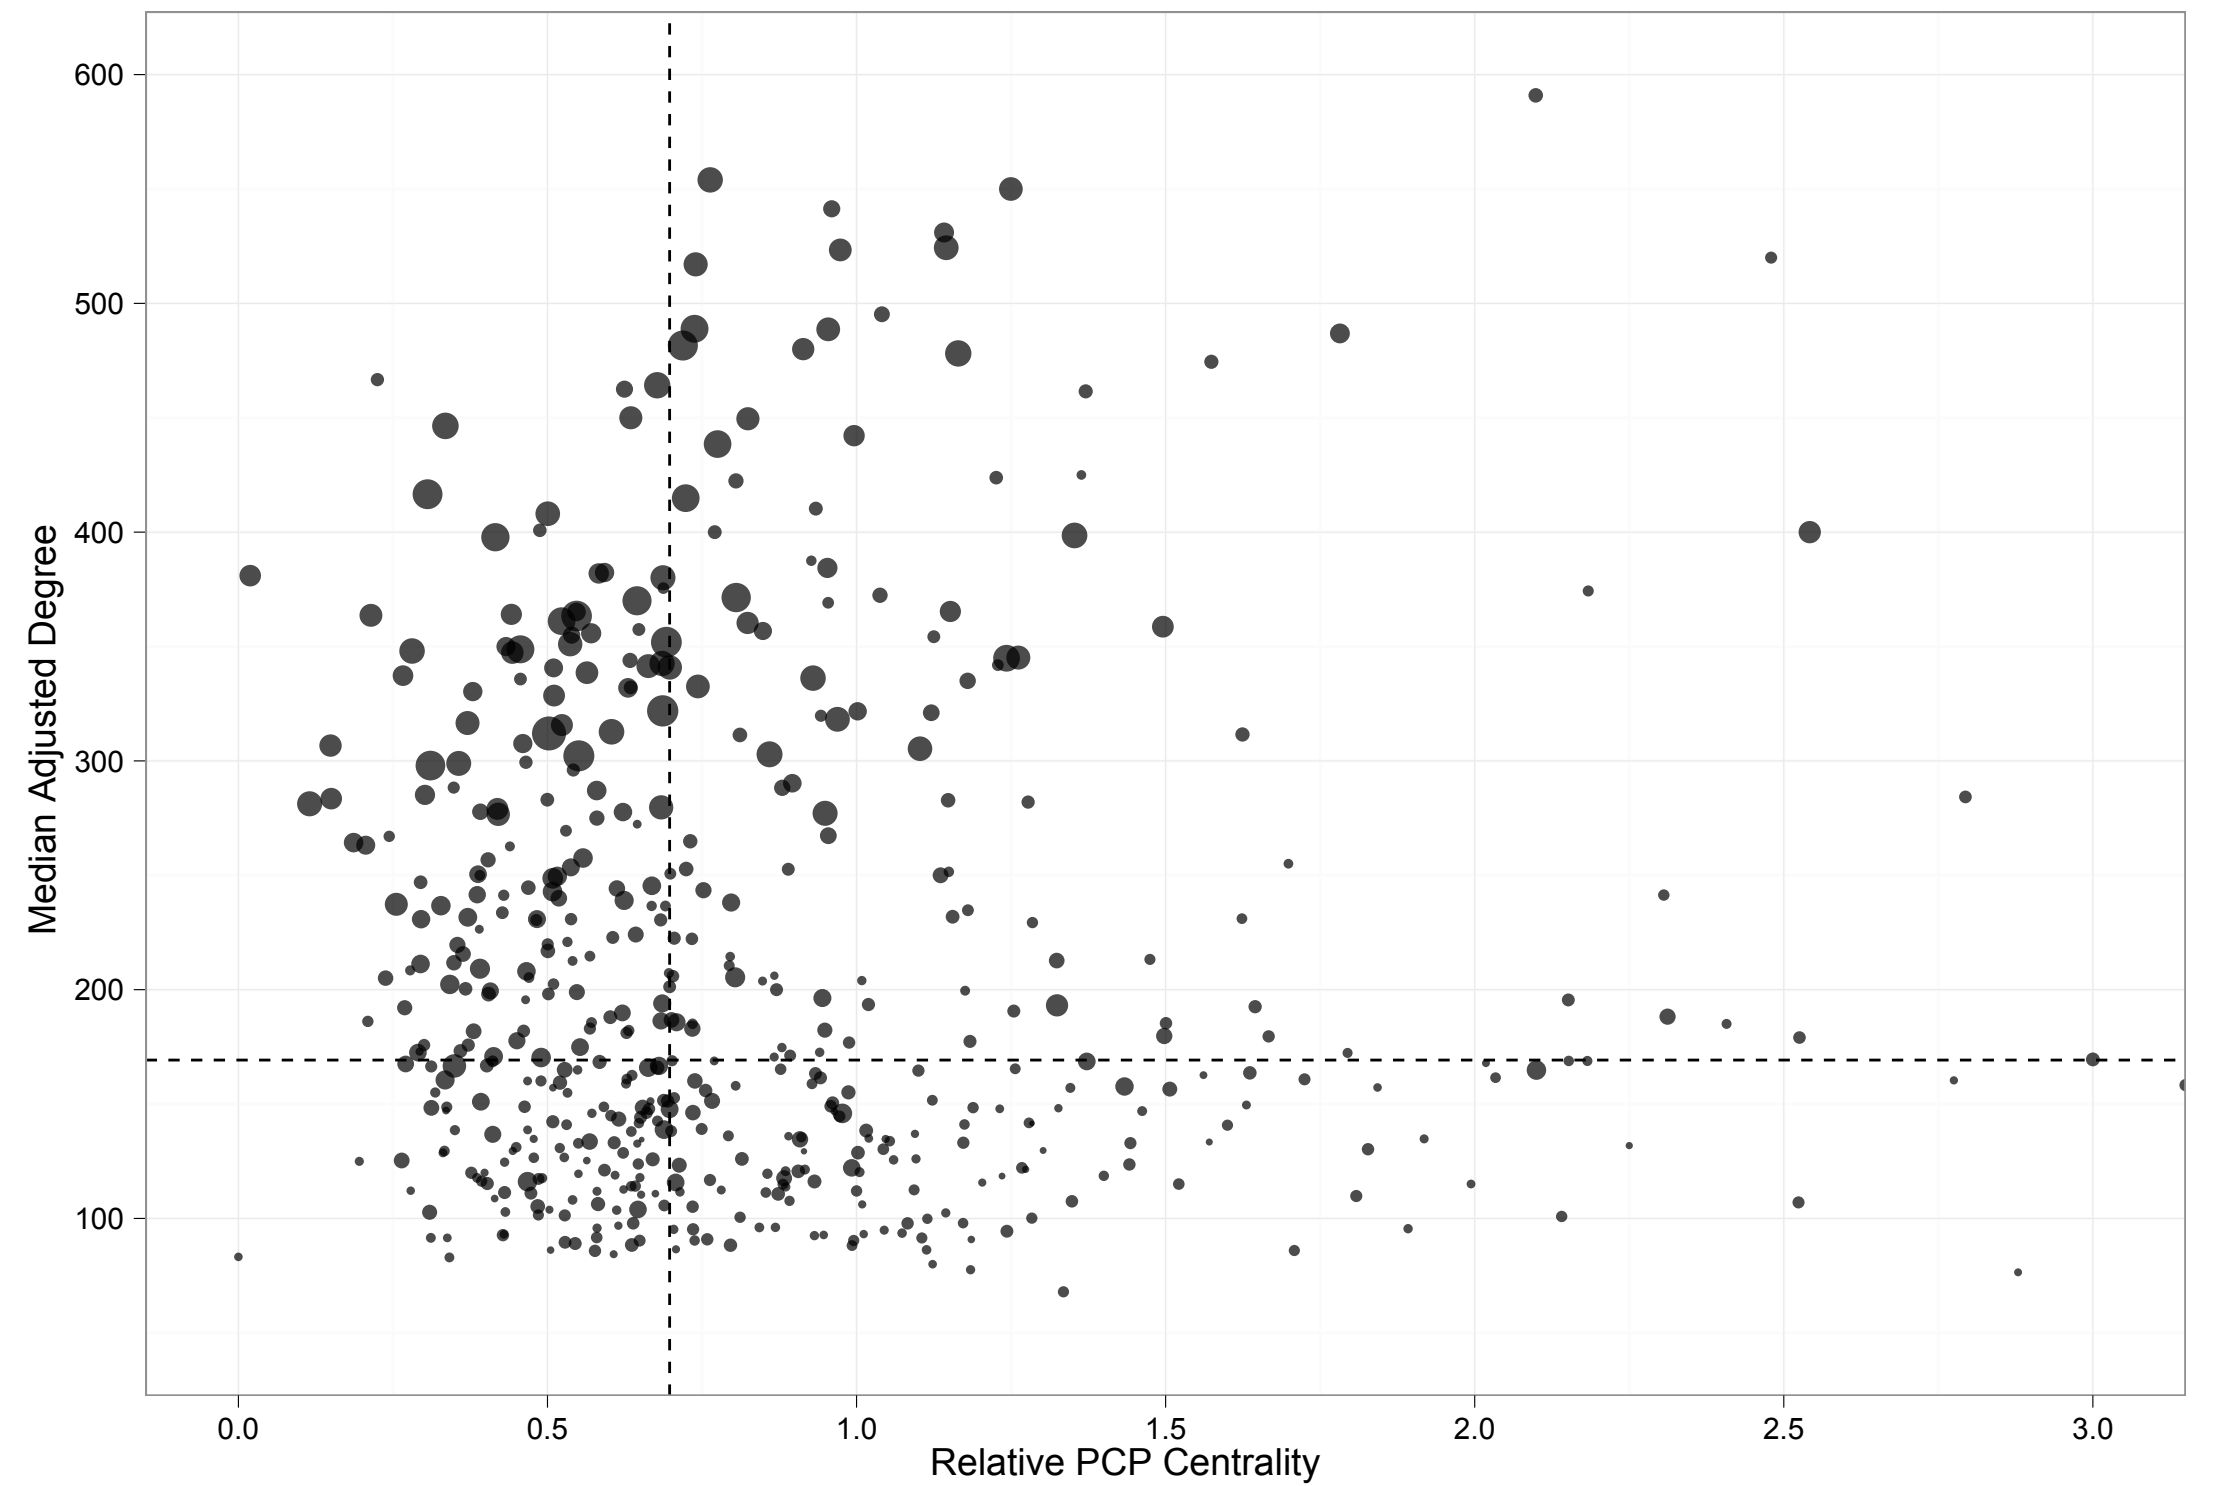

Supplement: NIHMS318646-supplement-1.pdf [file NIHMS318646-supplement-1.pdf]
